# Supplementary material for: A “thiol-ene” photo-curable hybrid fluorinated resist for the high-performance replica mold of nanoimprint lithography (NIL)
Source: Royal Society of Chemistry journal article supplement (doi:10.1039/c1jm13765d), 2011-12-20
Supplement: c1jm13765d.pdf [file c1jm13765d.pdf]

## Supporting information materials

# “Thiol-ene” photo-curable hybrid fluoridated resist for the high-performance replica molding of nanoimprint lithography (NIL)

Hong Lin<sup>†</sup>, Xia Wan<sup>‡</sup>, Xuesong Jiang<sup>†\*</sup>, Qingkang Wang<sup>‡</sup>, Jie Yin<sup>†§</sup>

*School of Chemistry and Chemical Engineering<sup>†</sup>, Research Institute of Micro/Nano  
Science and Technology<sup>‡</sup>, State Key Lab of Metal Matrix Composite<sup>§</sup>, Shanghai Jiao  
Tong University, Shanghai 200240, People’s Republic of China*

\*Corresponding author.

Tel.: +86-21-54747445. Fax: +86-21-54747445.

E-mail: ponygle@sjtu.edu.cn(X.J.)

**Table S1.** Swelling ratio (Qr) of the JTHC-b resists

| Solvent            | Swelling ratio (wt%)               |                                     |
|--------------------|------------------------------------|-------------------------------------|
|                    | POSS-SH/DCFA <sub>4</sub><br>(1:8) | POSS-SH/DCFA <sub>4</sub><br>(1:16) |
| 1 Methanol         | 2.5                                | 0.9                                 |
| 2 Ethanol          | 1.9                                | 0.6                                 |
| 3 n-Hexane         | 1.0                                | 0.6                                 |
| 4 Toluene          | 5.6                                | 1.7                                 |
| 5 n-butyl acrylate | 3.4                                | 2.9                                 |

The swelling ratio of the fully cured fluoridated mixtures was calculated according to following equation:  $Q_r = 100\% \times (W_s - W_d) / W_d$ . Here,  $W_s$  and  $W_d$  are the weights of the swollen samples for 24 h at 25°C in solution media and the dried sample for 24 h in vacuum dedicator, respectively.

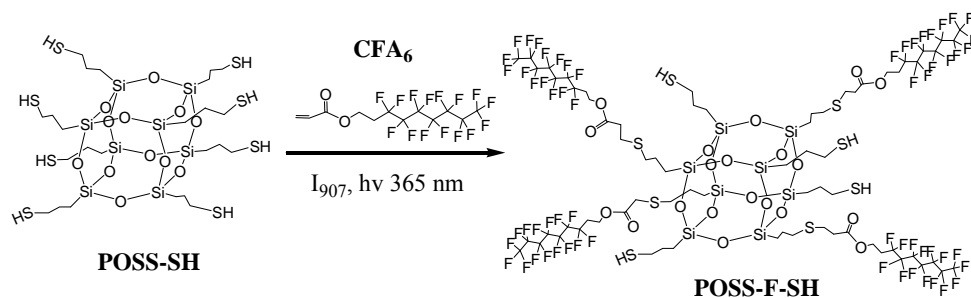

**Figure S1.** Synthesis of POSS-F-SH

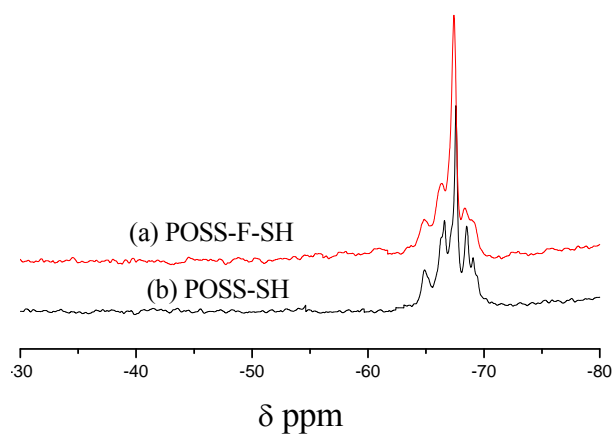

**Figure S2.**  $^{29}\text{Si}$  NMR of (a) POSS-F-SH and (b) POSS-SH in  $\text{CDCl}_3$ :  $^{29}\text{Si}$  NMR (d, ppm,  $\text{CDCl}_3$ ): -67.47(s).

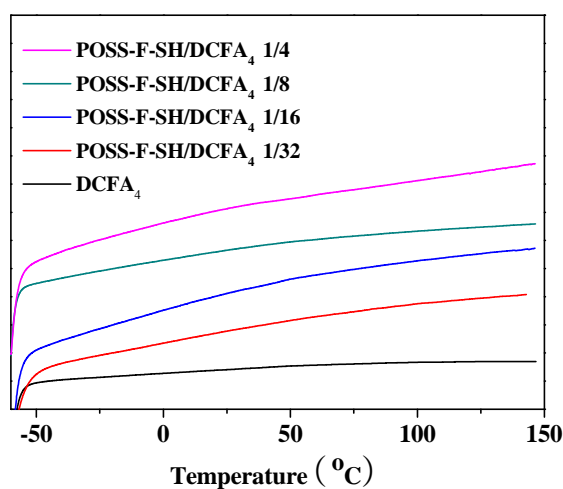

**Figure S3.** DSC curves of the  $\text{DCFA}_4$  film and their hybrid films containing

POSS-F-SH.

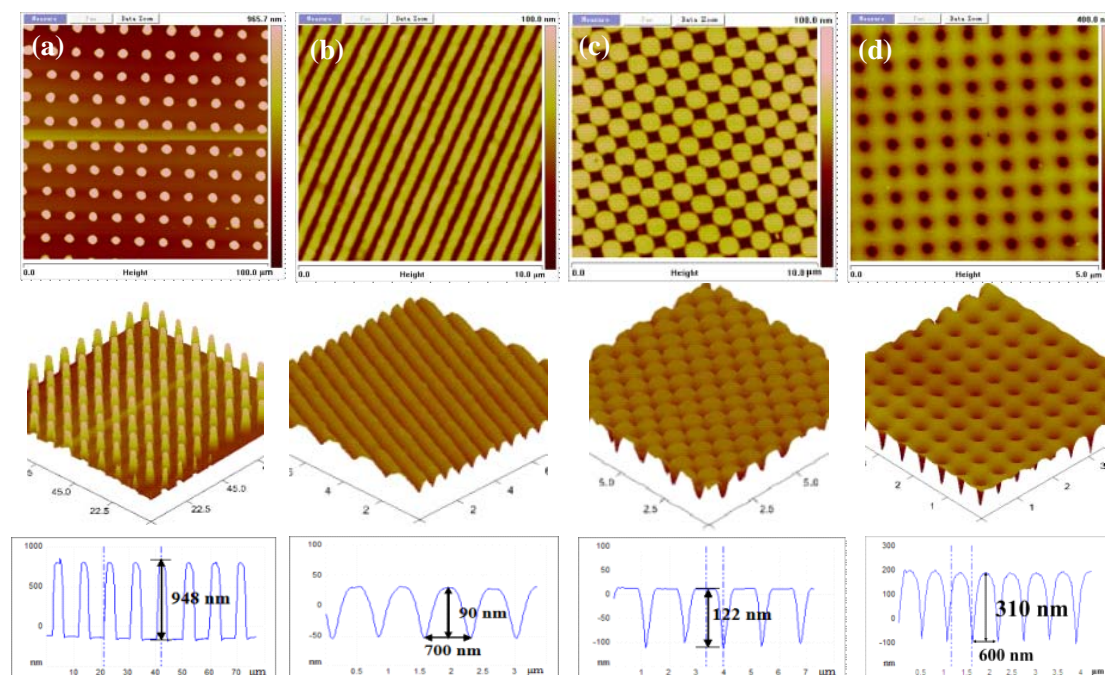

**Figure S4.** The perspective AFM and sectional profile images of NIL JTHC-b1 resist with different feature sizes: (a) 3.0  $\mu\text{m}$  lattice, (b) 350 nm grating, (c) 700 nm lattice and (d) 200 nm lattice.

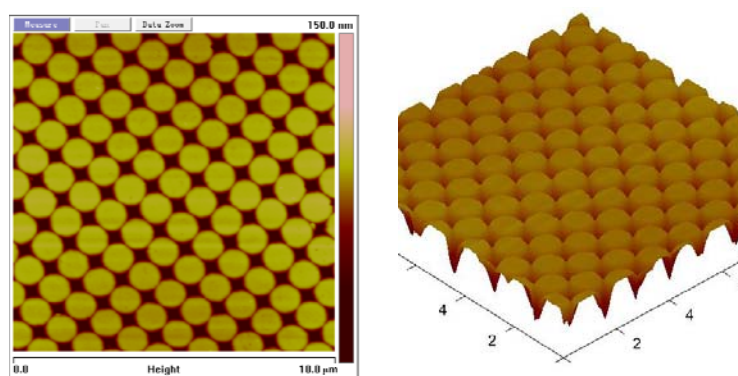

**Figure S5.** The perspective AFM and sectional profile images of the replica F-Mold after repeated UV-NIL for 10 times.
